# Supplementary material for: Reactive strategy-based SERS determination of O2˙−generated from sunscreen
Source: Royal Society of Chemistry journal article supplement (doi:10.1039/d0cc07517e), 2020-12-16
Supplement: d0cc07517e1.pdf [file d0cc07517e1.pdf]

## Supplementary Information

### Reactive strategy-based SERS Determination of $O_2^{\cdot-}$ Generated from Sunscreen

Mingcong Shu, Ye Ying\*, Haifeng Yang\*

School of Chemistry and Materials Science, Shanghai Normal University, Shanghai  
200234, China

---

\*Corresponding authors E-mail: ye.jade.ying@hotmail.com (Ye Ying);  
haifengyang@yahoo.com (Haifeng Yang)

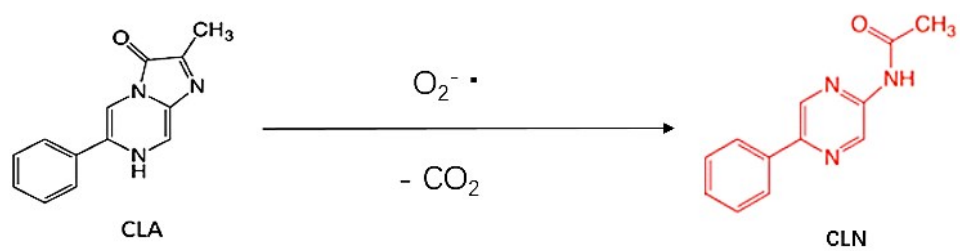

**Fig S1.** Schematic illustration of CLA reaction with  $O_2^{\cdot -}$  into dioxetane analog (CLN).

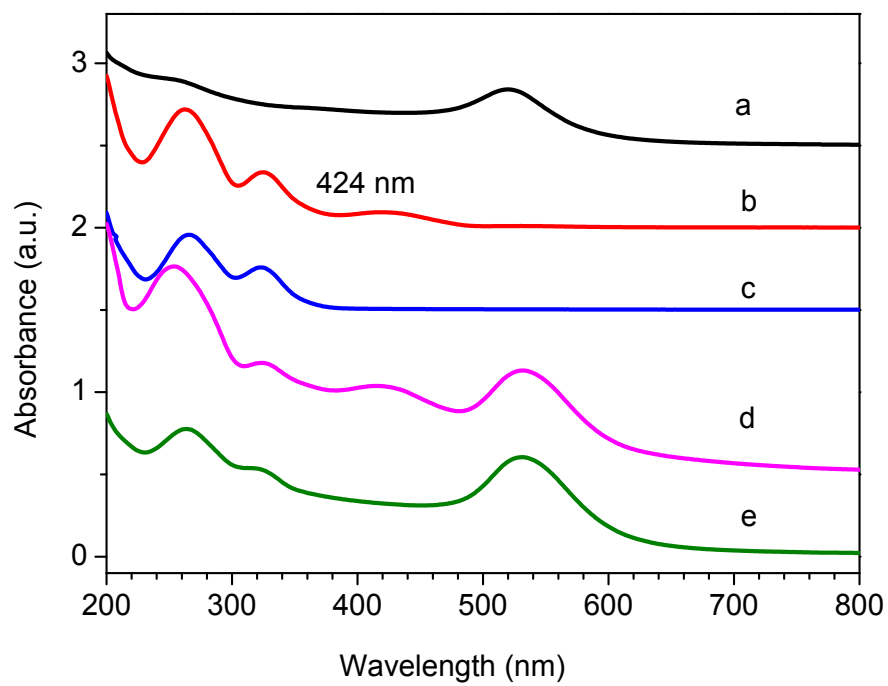

**Fig S2.** UV-Vis spectra of (a) Au NPs, (b) CLA, (c) CLN, (d) Au NPs and CLA, (e) Au NPs and CLN.

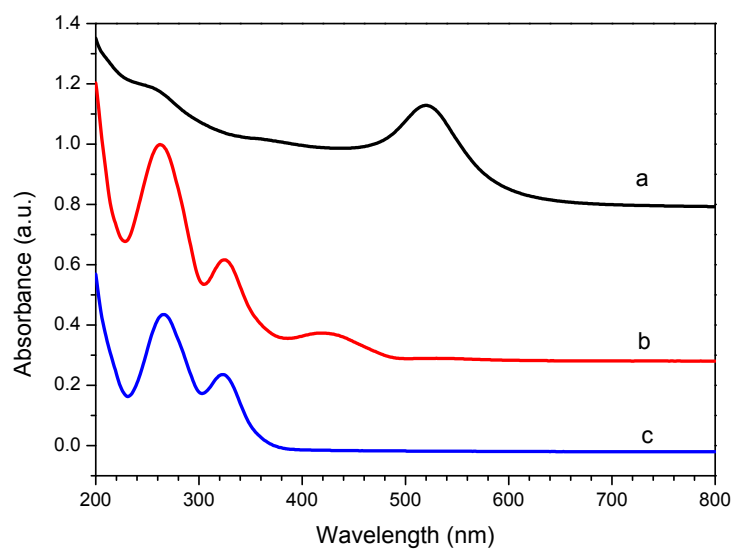

**Fig S3.** UV-Vis spectra of CLA (a) 0.1 mmol/L, (b) 10  $\mu\text{mol/L}$ , (c) 1  $\mu\text{mol/L}$ .

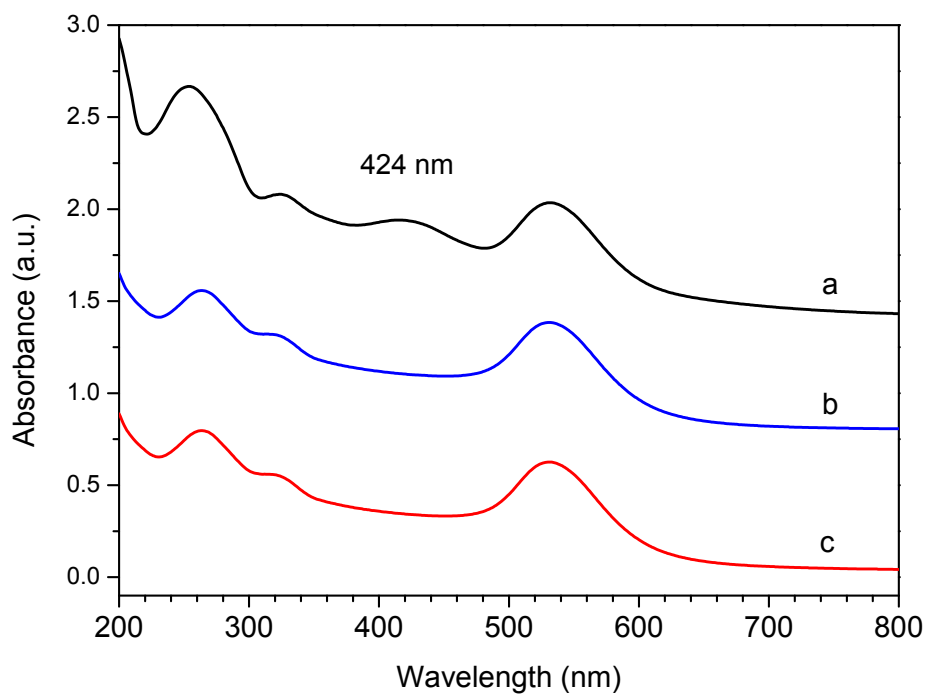

**Fig S4.** UV-vis spectra of TiO<sub>2</sub> with Au NPs/CLA under different radiation time (a) 2h, (b) 3h, (c) 4h.

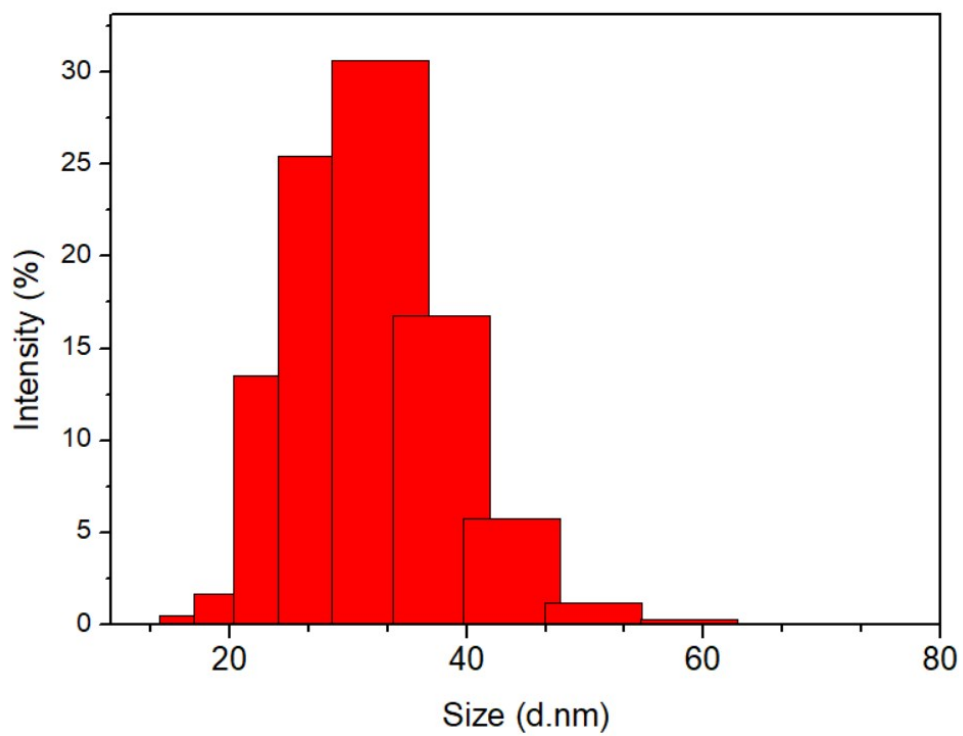

**Fig S5.** Size distribution of Au NPs.

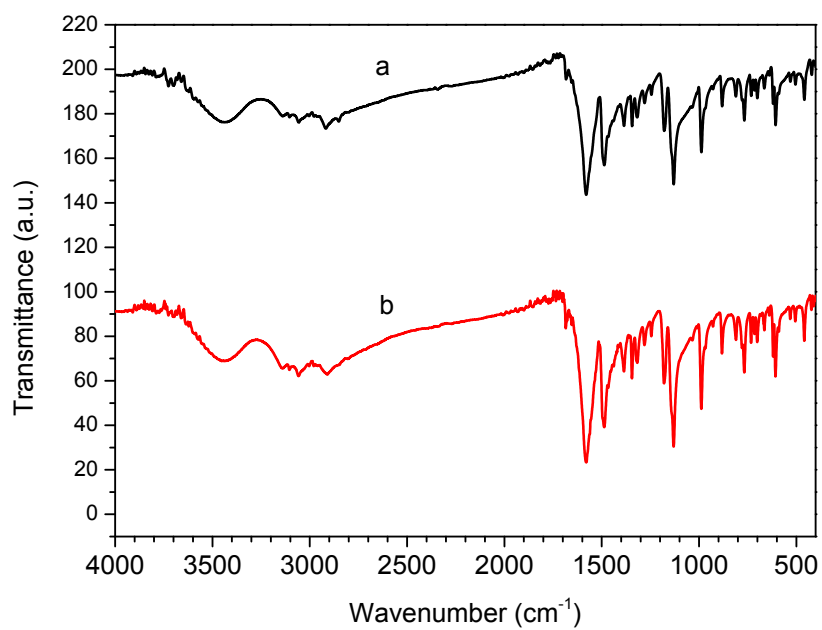

**Fig S6.** FTIR spectra of (a) CLA, (b) Au NPs + CLA.

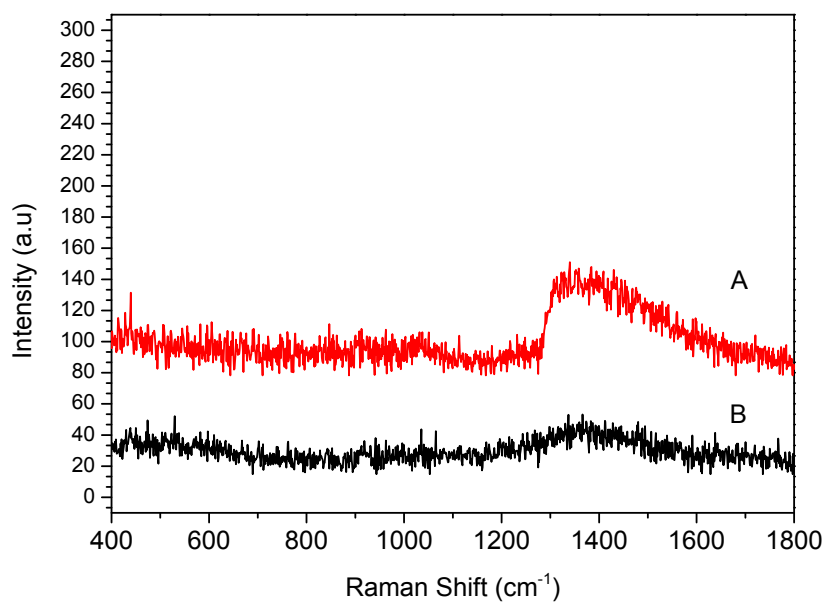

**Fig S7.** Raman spectra of (A) CLA, (B) CLN.



### Principle of kit determination $O_2^{\cdot-}$ :

$O_2^{\cdot-}$  reacts with hydroxylamine to form nitrite ions (reaction equation:  $NH_2OH + 2 O_2^{\cdot-} + H^+ = NO_2^- + H_2O_2 + H_2O$ ).  $NO_2^-$  reacts with p-aminobenzene sulfonic acid and  $\alpha$ -naphthylamine to produce the pink azo dye, 4-((2-aminonaphthalen-1-yl)diazenyl)benzenesulfonic acid, i.e. PANE, which has significant light absorption at 530 nm.

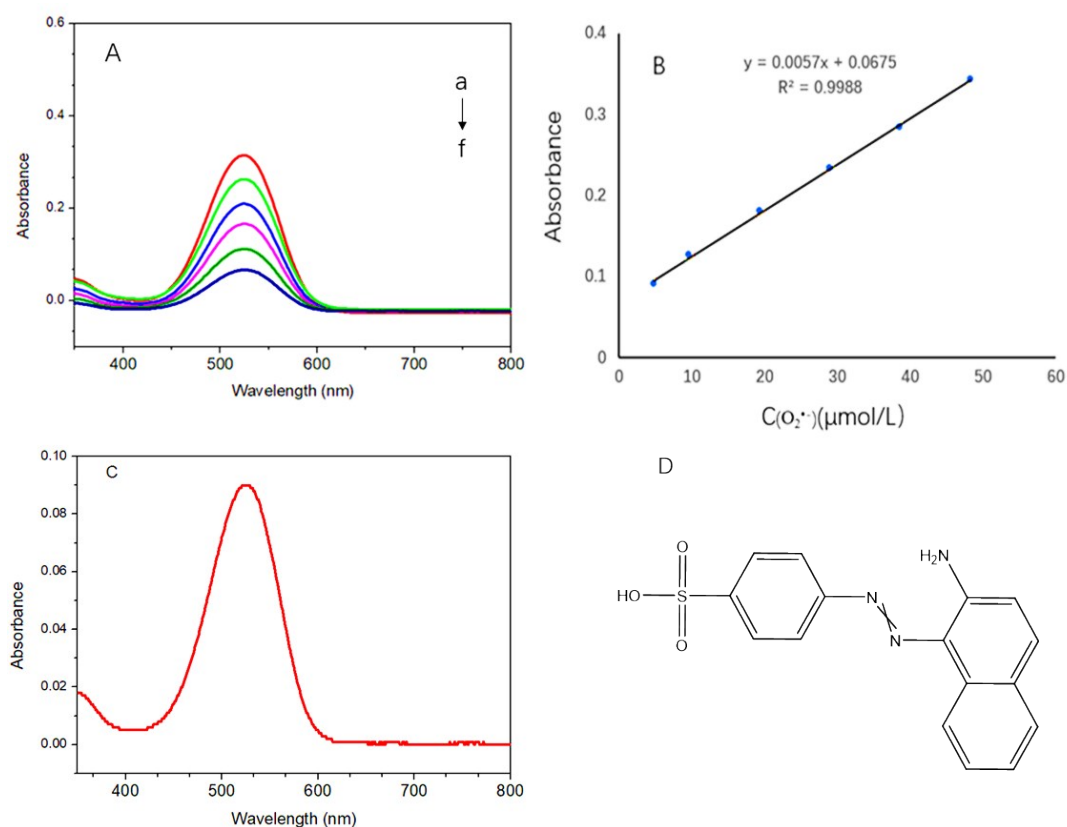

**Fig. S8.** (A) UV-Vis spectra of PANE concentration (a) 10  $\mu\text{g/mL}$ , (b) 8.0  $\mu\text{g/mL}$ , (c) 6.0  $\mu\text{g/mL}$ , (d) 4.0  $\mu\text{g/mL}$ , (e) 2.0  $\mu\text{g/mL}$ , (f) 1.0  $\mu\text{g/mL}$ , (B) Standard curve line of  $O_2^{\cdot-}$  ( $n=3$ ), (C) UV-Vis Spectrum of PANE concentration under the ultraviolet analyzer for 3 hours, (D) molecular structure of PANE.

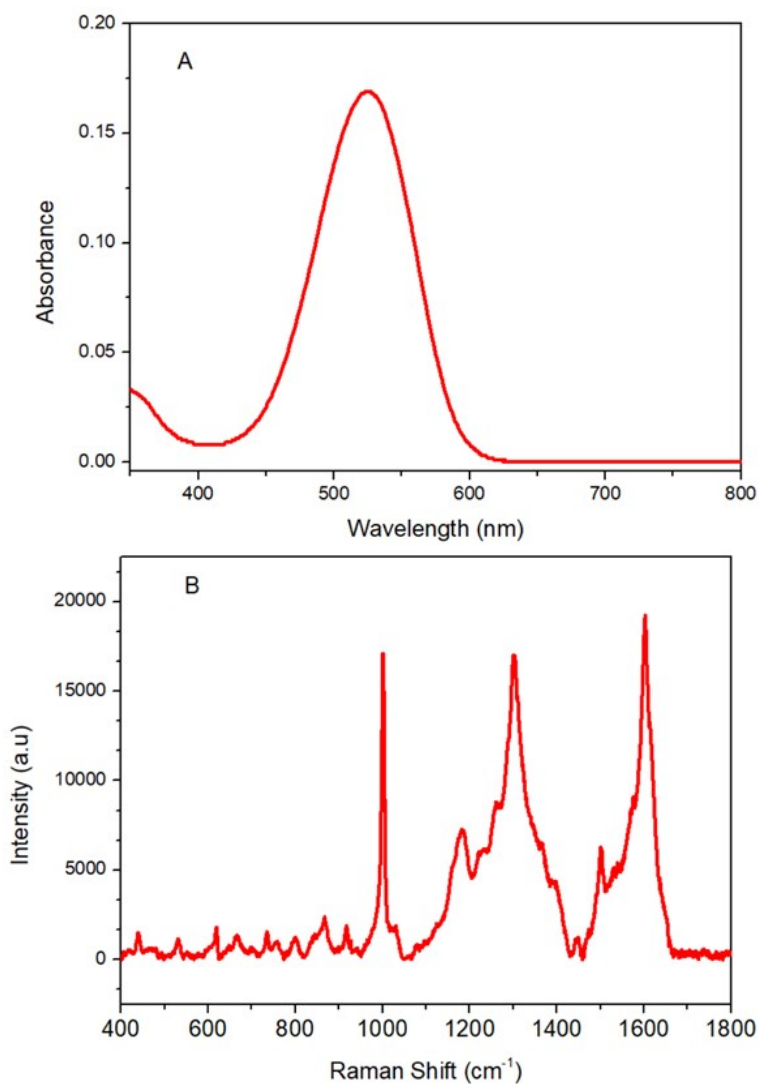

**Fig. S9.** (A) UV-Vis spectrum of PANE, (B) SERS spectrum of Au NPs/CLN.

**Relative Error (RE) calculation :**

The concentration was  $C_0 = 9.91 \times 10^{-6}$  mol/L by UV calculated.

The concentration was  $C_1 = 8.93 \times 10^{-6}$  mol/L by SERS calculated.

$$\text{Computational formula: RE} = \frac{|C_1 - C_0|}{C_0} \times 100\%$$

$$\text{RE} = \frac{|8.93 - 9.91|}{9.91} \times 100\% = 9.86\%$$

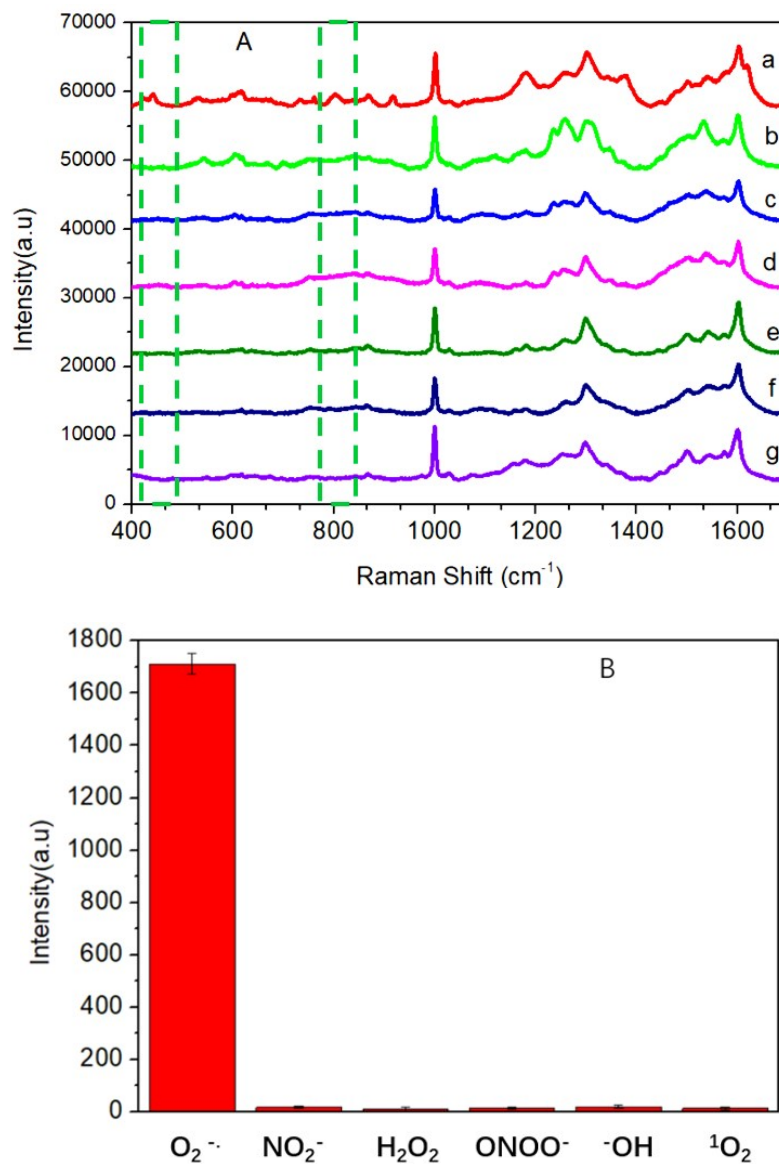

**Fig. S10.** (A) SERS spectra of (a) Au NPs/CLA+ O<sub>2</sub><sup>-•</sup>, (b) Au NPs/CLA, (c) Au NPs/CLA+NO<sub>2</sub><sup>-</sup>, (d) Au NPs/CLA+H<sub>2</sub>O<sub>2</sub>, (e) Au NPs/CLA+ONOO<sup>-</sup>, (f) Au NPs/CLA+•OH, (g) Au NPs/CLA+<sup>1</sup>O<sub>2</sub>, (ROS concentration is 1.0 μmol/L), (B) Plot demonstrated the selectivity of the SERS nanosensors based on the band of 802 cm<sup>-1</sup>.

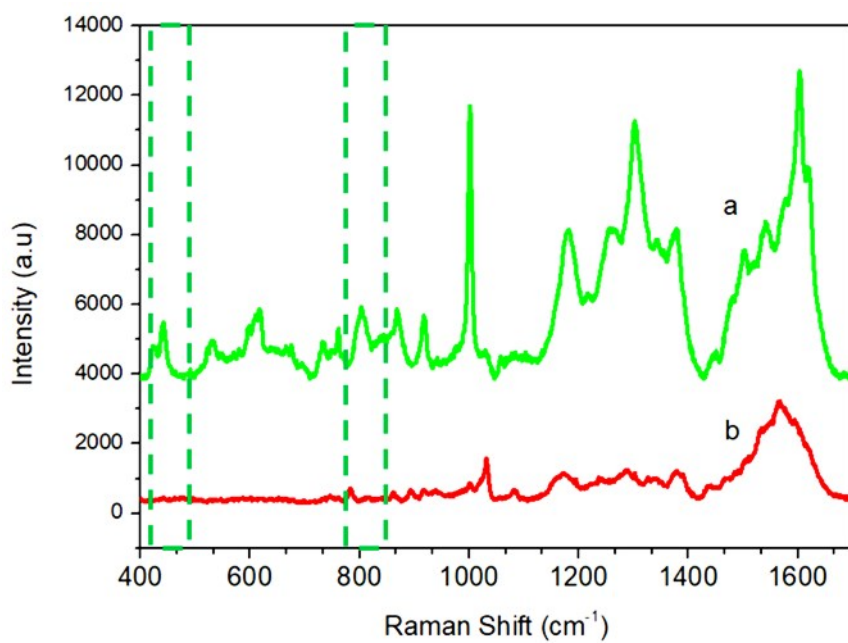

**Fig. S11.** SERS spectra of (a) Au NPs/CLN, (b) Au NPs/sunscreen after UV irradiation.

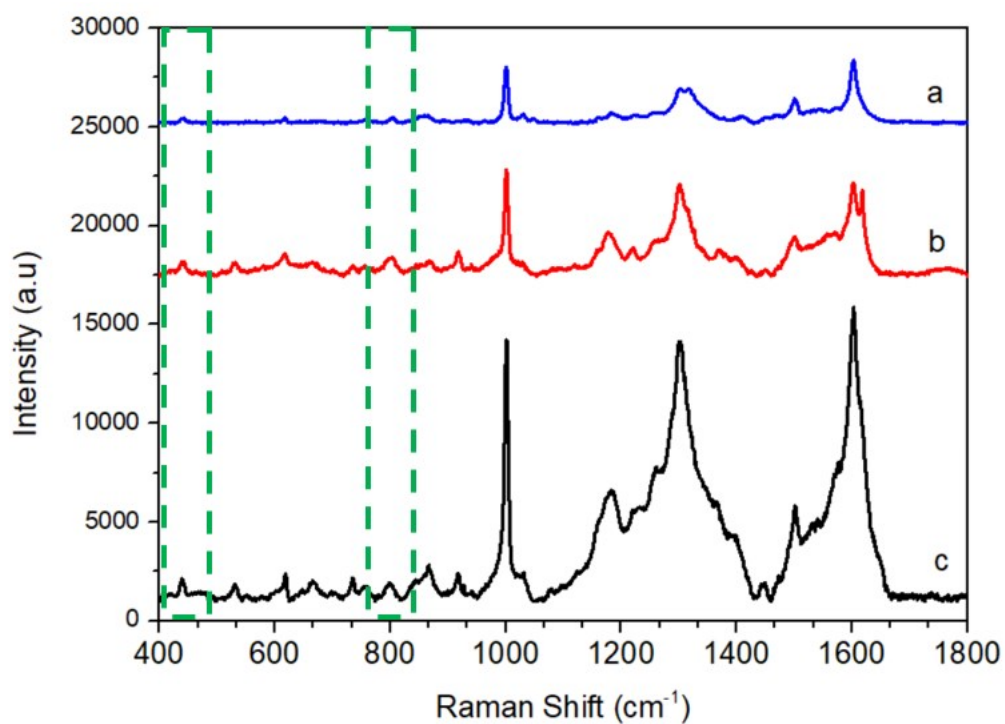

**Fig S12.** SERS spectra of 1.0 g sunscreen under different UV exposure time: (a) 30 min, (b) 1 h, (c) 2 h.

**Table S1.** Methods for the determination of superoxide anion radical

| Method           | Linearity range<br>(mol/L)                  | LOD<br>(nmol/L) | Ref       |
|------------------|---------------------------------------------|-----------------|-----------|
| Electrochemistry | $3.0 \times 10^{-8}$ — $2.1 \times 10^{-7}$ | 17.5            | 1         |
| Fluorescence     | $2.0 \times 10^{-5}$ — $8.0 \times 10^{-5}$ | 70.5            | 2         |
| Bioluminescent   | /                                           | 3.5             | 3         |
| RSS              | $5.0 \times 10^{-8}$ — $5.0 \times 10^{-5}$ | 9               | This work |

## References:

1. X. Shen, Q. Wang, Y. Liu, W. Xue, L. Ma, S. Feng, C. Mao. *Sci Rep-UK*, 2016, **6**, 28989.
2. J. Yang, X. L. Liu, H. L. Wang, H. Q. Tan, X. X. Xie, X. Zhang, C. C. Liu, X. Qu, J. L. Hua. *Analyst*, 2018, **143**, 1242–1249.
3. K. Thandavan, S. Gandhi, S. Sethuraman, J. B. Ravappan, U. K. Krishnan. *Sens Actuators B*, 2013, **176**, 884-892
